# Supplementary material for: Genome-Wide Identification of Brassinosteroid Signaling Downstream Genes in Nine Rosaceae Species and Analyses of Their Roles in Stem Growth and Stress Response in Apple
Source: Front Genet. 2021 Mar 18;12:640271. doi: 10.3389/fgene.2021.640271 (PMC8012692; doi:10.3389/fgene.2021.640271)
Supplement: Supplementary Table 1 — The roles of BR signaling downstream genes in rice. [file Table_1.xlsx]

## Sheet: Table S1
Table S1 The roles of BR signaling dowmstream genes in rice.
Gene type	Response & Mechanism	Reference
BZR1/2	BR signal transcription factors, regulation of rice architecture and stress adaption	Bai et al., 2007
DLT	Acting as a direct downstream target of BZR1/2 to positively regulate lamina inclination and plant height of rice	Tong et al., 2009 and 2012
LIC	Acting as a direct downstream target of BZR1/2 to positively regulate lamina inclination of rice	Zhang et al., 2012
ILI1	Acting as a direct downstream target of BZR1/2 to positively regulate lamina inclination and plant height of rice	Zhang et al., 2009
OSH1	Targeting several BR catabolic genes to repress BR levels to prevent cell differentiation and maintain SAM activity	Tsuda et al., 2014
RAVL1/RAV6	Regulation of leaf angle and seed size, and maintaining BR homeostasis	Il Je et al., 2010 and Zhang et al., 2015
SMOS1	Functioning with BZR1 to regulate BR signaling and rice architecture	Qiao et al., 2017 and Hirano et al., 2017
CSA	Regulation of plant height and grain size as one of targets of OsBZR1	Zhu, et al., 2015
SPY	Regulation of BR synthesis and GA signaling in rice	Shimada et al., 2006
GSR1	Involving in BR metabolism and crosstalk between GA and BR in rice	Wang et al., 2009

## Sheet: Table S2
Table S2 Summary of plant materials and treatments
Plant type	Application	Reference
M9	ST, YX, YP, MX, MP, YL, ML and R samples	Zheng et al., 2018 and 2019
M9	BR and BRZ treatment	Zheng et al., 2019
M9	GA treatment	Zheng et al., 2019
M9	IAA treatment	Zheng et al., 2019
Pingyitiancha	CK treatment	Zheng et al., 2019
YF and CF	Comparasion of short and standard branch varieties	Song et al., 2017
CF/M9 and CF/CF	Comparasion of dwarf and vigorous apple trees	Song et al., 2017
CF/M26	ABA, MeJA, SA, drought and salt treatments	Chen et al., 2018

## Sheet: Table S3
Table S3 Primer sequences for qRT-PCR, gene clonging, and subcellular localization analyses.
Gene name	Forward primer	Reverse primer
MdBZR1	CAAGAGCGATTGGGACGAAG	GGCTGAATGTTGGCGATGAT
MdBZR1_clone	GGCCAGTGAATTCCGAATGA	CGCACACAACTAAAGACGGT
MdBZR1-pCAMBIA1302	TGCGGCGAGCGGTATCCATGGATGCCGACGTGGAAGGAG	TCTCCTTTACTAGTCAGATCTCCTTGTTCGAGTGCTCCC
MdBZR2	TCCCAAGCCCAACATCATCT	CAGGGCTTGGTGGAGTAGAA
MdBZR3	CATCAACCAAGATCAGCCCG	CAGTTGGGAATTGGGTTGGG
MdBZR4	TTACCCTTTCCTGCCTTCGT	AGGCTGAATGTTGGGGATGA
MdBZR4_clone	TCCTCGCCTCTAATCGGTTC	TTCCTGAGCGACCGAATGAT
MdBZR5	CCCTCCATTAAGCTCCCCAA	CAGGGCTTGGTGGAGTAGAA
MdBZR6	TTCATCCAATCCCTGCCACT	CAGTTGGGAATTGGGTTGGG
MdBZR6_clone	CGCGTTTGGGAATCACTACA	TCAGAGGTTACATGGGCCAA
MdBZR7	GTGCTCCTGTAACTCCACCT	TGTAGGACTTGAAGGGGCAG
MdBZR7_clone	CGATTCATCTGCAGCTCGAG	GCTCAGAAGGGTAGGAGGTG
MdBZR8	GTGCCATCTTACCATGCCAG	GGTGGAGTTACAGGAGCACT
MdDLT	GGAGGATGTGAGGGTTTGGA	CCAAGGGAAGGCTAGAACCA
MdLIC	CCCTGCCTCTACACATGGAA	GTGCCTCTGGTGGATCTTCT
MdILI1-1	TTACAGCAGCTTCTTCCCGA	TCGTTATCCATGTCCGTCGT
MdILI1-2	AGCAGAAGATCCTCTCGGTC	TCGTTATCCATGTCCGTCGT
MdOSH1-1	GGTGGCGATTTTGTTGGACT	CTTCTGAGCCTCCGATGGAT
MdOSH1-2	TTCTGAGGCAGCAAAGAGGA	GCTGGGTGTCAATGTTGGAG
MdRAVL1-1/MdRAV6-1	CCTCCTTCTTCCGATCCCTC	GCCCCAAAGTCTGAGAGTCT
MdRAVL1-2/MdRAV6-2	GCTGCTGAGGGTGGTACTAA	TTGAGCTTCCCTACATCGCT
MdSMOS1-1	ACCCAAACAACTCCCTCACA	TTCGCCGTACATCCTCTCTC
MdSMOS1-2	GAGAGAGGATGTACGGCGAA	AGCCTCTTCGTCGTCATAGG
MdSMOS1-3	ATGTCTCTCCAAACGGACGT	CAGAAGGGAGAACTGGAGCA
MdCSA	CAGTGAGAGGAGTTGGAGCA	GGATGGTGGTGGTCTTCTCA
MdSPY1	GTTGATCCCTCGCCATTTCC	CTTCAAACACCTTCCCTGCC
MdSPY2	TGAATGATTCGCAGCCTTCG	TGCGAAACTGTCAAAAGCGA
MdGSR1	GTTTCCATTGCTCGCCAGAT	TGAGGACAAGGCAAACAAGC
EF-1a	ATTCAAGTATGCCTGGGTGC	CAGTCAGCCTGTGATGTTCC

## Sheet: Table S4
Table S4 Details regarding BR downstream gene families in Arabidopsis, rice, and nine rosaceae species
ID	Gene Name	CDS(bp)	Peptide(aa)	Molecular weight(KD)	Instability index	pI	Amino acid composition	Aliphatic index	Grand average (GRAVY)	Subcellular localization
AT1G75080.1	AtBZR1	1008	336	36.46	75.02	9.19	S(14.3%)AP(10.1%)R(6.0%)	52.08	-0.656	Nucleus
AT1G19350.3	AtBZR2	1005	335	36.46	78	9.24	S(14.9%)P(10.1%)A(9.6%)	54.27	-0.667	Nucleus
LOC_Os07g39220.1	OsBZR1	894	298	31.91	66.22	8.76	S(12.4%)P(11.7%)A(9.7%)	59.66	-0.554	Nucleus
LOC_Os01g10610.1	OsBZR2	1095	365	37.92	57.53	8.99	S(12.9%)G(12.6%)P(11.0%)	56.71	-0.481	Nucleus
MD00G1007700	MdBZR1	993	331	35.28	58.67	8.74	S(14.2%)P(10.3%)G(9.4%)	52.54	-0.608	Nucleus
MD03G1246200	MdBZR2	972	324	34.79	57.34	8.5	S(15.4%)P(9.9%)A(8.6%)	54.6	-0.584	Nucleus
MD08G1035400	MdBZR3	885	295	32.21	70.41	9.43	P(12.9%)S(12.2%)A (9.8%)	62.95	-0.613	Nucleus
MD10G1274200	MdBZR4	993	331	35.35	57.07	8.57	S(14.5%) P( 1 0.0%)G(9.1%)	51.09	-0.622	Nucleus
MD11G1267200	MdBZR5	972	324	34.89	58.38	8.09	S(13.6%)P(10.5%)G(8.6%)	55.77	-0.54	Nucleus
MD15G1031900	MdBZR6	885	295	32.31	66.39	9.35	P(13.6%)S(11.9%)A(8.5%)	60.61	-0.661	Nucleus
MD15G1267600	MdBZR7	945	315	33.98	72.01	8.73	S(12.7%)P(10.2%)A(8.9%)	58.92	-0.628	Nucleus
MD15G1267800	MdBZR8	684	228	25.3	75.55	9.46	S(13.6%)P(9.6%)L(7.5%)	70.57	-0.168	Nucleus
XP_004291900.1	FvBZR1	1164	388	43.45	65.19	10.11	S(12.6%)P(9.8%)R(9.0%)	54.61	-0.712	Nucleus
XP_004294130.1	FvBZR2	1074	358	38.82	55.06	7.63	S(14.8%)P(8.7%)G(8.4%)	61.09	-0.484	Nucleus
XP_004300602.1	FvBZR3	966	322	34.86	75.2	9.16	S(13.7%)P(11.2%)G(8.4%)	58.2	-0.684	Nucleus
XP_004309625.1	FvBZR4	987	329	34.93	58.46	8.73	S(14.3%)PG(9.7%)A(8.2%)	53.16	-0.564	Nucleus
Bras_G00984	RoBZR1	969	323	34.92	72.08	9.04	S(13.9%)P(10.2%)G(8.4%)	60.12	-0.634	Nucleus
Bras_G02404	RoBZR2	945	315	34.43	67.94	9.4	S(14.3%)P(11.4%)A(7.3%)	56.73	-0.641	Nucleus
Bras_G05304	RoBZR3	987	329	35	60.57	8.73	S(15.8%)P(10.0%)G(9.1%)	53.43	-0.584	Nucleus
Bras_G27656	RoBZR4	1080	360	38.89	57.67	8.55	S(13.9%)PG(8.6%)A(8.1%)	62.14	-0.469	Nucleus
KAB2623559.1	PcBZR1	972	324	34.6	58.92	8.71	S(15.7%)P(9.9%)A(8.6%)	55.8	-0.578	Nucleus
KAB2628071.1	PcBZR2	885	295	32.3	68.81	9.32	P(12.9%)S(11.5%)A(9.8%)	65.59	-0.605	Nucleus
KAB2628073.1	PcBZR3	7248	2416	266.69	46.48	8.8	S(9.9%)L(8.4%)A(7.2%)	79.6	-0.431	Cytoplasm. Nucleus.
KAB2601349.1	PcBZR4	993	331	35.51	58.88	8.57	S(14.5%)P(10.0%)G(8.5%)	53.72	-0.58	Nucleus
KAB2605515.1	PcBZR5	972	324	34.76	60.25	8.5	S(14.2%)P(9.6%)G(9.0%)	58.49	-0.576	Nucleus
KAB2618008.1	PcBZR6	948	316	34.028	69	8.89	S(13.3%)P(9.8%)A(8.9%)	62.44	-0.575	Nucleus
XP_007223253.1	PpBZR1	882	294	32.13	70.11	9.23	S(14.3%)P( 12.2%)A(8.5%)	62.79	-0.622	Nucleus
XP_020418322.1	PpBZR2	969	323	34.51	59.66	8.8	S(14.9%)P(9.9%)G(9.0%)	54.43	-0.604	Nucleus
XP_007211588.1	PpBZR3	972	324	34.81	56.98	8.38	S(13.3%)P(9.9%)G(9.6%)	53.7	-0.608	Nucleus
XP_007202252.1	PpBZR4	951	317	34.24	71.42	9.05	S(13.2%)P(10.1%)G(8.2%)	58.2	-0.667	Nucleus
XP_021809451.1	PaBZR1	534	178	19.09	56.43	6.32	S( 11.8%)P( 10.1%)GLT(8.4%)	67.42	-0.56	Nucleus
XP_021813188.1	PaBZR2	969	323	34.51	59.66	8.8	S(14.9%)P(9.9%)G(9.0%)	54.43	-0.604	Nucleus
XP_021814942.1	PaBZR3	1035	345	36.82	56.64	8.38	S(13.9%)P(10.1%)G(9.9%)	55.8	-0.551	Nucleus
VVA23002.1	PdBZR1	882	294	32.12	69.54	9.06	S(14.3%)P(12.2%)A(8.5%)	63.78	-0.6	Nucleus
VVA29367.1	PdBZR2	969	323	34.49	59.02	8.8	S(14.9%)P(9.9%)G(9.0%)	55.63	-0.596	Nucleus
VVA18967.1	PdBZR3	990	330	35.5	58.31	8.37	S( 13.9%)P(9.7%)G(9.1%)	55.97	-0.569	Nucleus
VVA09670.1	PdBZR4	954	318	34.27	72.44	9.05	S(13.8%)P(10.1%)G(8.2%)	57.42	-0.667	Nucleus
PRQ47704.1	RcBZR1	702	234	25.08	80.8	6.44	S(16.7%)P(12.8%)L(7.3%)	60.43	-0.524	Nucleus
PRQ29258.1	RcBZR2	738	246	25.16	64.69	5.33	S(19.5%)P(12.2%)G(10.2%)	54.43	-0.378	Nucleus
PRQ30940.1	RcBZR3	975	325	34.89	57.14	8.13	S(15.4%)PG(9.2%)A(7.7%)	55.32	-0.612	Nucleus
PRQ26992.1	RcBZR4	1074	358	39.83	59.51	9.42	S(14.5%)P(8.9%)RT(7.8%)	58.35	-0.576	Nucleus
XP_008220760.1	PmBZR1	882	294	32.11	71.29	9.21	S(14.3%)P(12.2%)A( 8.5%)	62.79	-0.619	Nucleus
XP_008225238.1	PmBZR2	969	323	34.51	59.66	8.8	S(14.9%)P(9.9%)G( 9.0%)	54.43	-0.604	Nucleus
XP_008226380.1	PmBZR3	972	324	34.65	63.16	8.02	S(13.0%)P(10.2%)G(9.6%)	53.7	-0.584	Nucleus
XP_008241630.1	PmBZR4	951	317	34.16	73.73	9.05	S(13.6%)P(10.1%)G(8.2%)	58.83	-0.652	Nucleus
AT1G63100.1	AtDLT	1992	663	70.79	52.26	6.7	S(9.5%)L(9.2%)R(8.7%)	75.97	-0.543	Nucleus
LOC_Os06g03710.1	OsDLT	1851	617	65.85	49.73	6.02	A(15.2%)G(11.2%)R(8.4%)	68.2	-0.331	Nucleus
MD06G1073500	MdDLT	2052	684	75.42	51.78	5.56	S(10.4%)L(9.6%)G(8.0%)	78.03	-0.406	Nucleus
XP_004298743.1	FvDLT	1962	654	72.59	56.23	5.47	S(10.4%)L(9.8%)E(8.6%)	78.59	-0.427	Nucleus
Bras_G14840	RoDLT	1983	661	73.16	52.3	5.29	L(10.3%)S(10.1%)E(8.6%)	77.78	-0.491	Nucleus
KAB2632657.1	PcDLT	2034	678	74.66	52.71	5.61	S(10.5%)L(9.7%)AE(8.4%)	79.73	-0.372	Nucleus
XP_007209056.1	PpDLT	2091	697	76.77	50.55	5.43	S(10.2%)L(10.0%)A( 8.3%)	79.54	-0.416	Nucleus
XP_021809847.1	PaDLT	2091	697	76.79	49.97	5.48	L(10.3%)S(10.0%)A(8.0%)	80.37	-0.403	Nucleus
VVA30166.1	PdDLT	2091	697	76.8	52.46	5.44	L(10.3%)S(10.0%)A(8.5%)	79.7	-0.423	Nucleus
PRQ17819.1	RcDLT	1980	660	72.8	53.32	5.54	S(10%)L(9.7%)E(8.9%)	77.15	-0.468	Nucleus
XP_008238774.1	PmDLT	2091	697	76.86	51.18	5.39	L(10.5%)S(10.3%)A(7.9%)	80.37	-0.413	Nucleus
AT1G75340.1	AtLIC	1308	435	46.8	53.01	8.81	S(10.8%)PNQ(10.1%)T(8.7%)	36.67	-0.817	Nucleus
LOC_Os06g49080.1	OsLIC	1170	390	42.66	70.03	8.94	Q(12.3%)S(11.5%)P(10.0%)	43.85	-0.862	Nucleus
MD04G1000600	MdLIC	1170	390	42.25	46.93	8.07	S(11.8%)P(8.5%)G(8.2%)	55.05	-0.671	Nucleus
XP_011462501.1	FvLIC	1134	378	40.99	65.2	7.1	S(14.6%)P(9.0%)NG(6.9%)	54.47	-0.673	Nucleus
Bras_G14914	RoLIC	1221	407	44.34	56.62	7.1	S(14%)P(8.4%)N(7.6%)	59.41	-0.647	Nucleus
KAB2623227.1	PcLIC	1245	415	44.9	45.46	7.62	S(12.5%)P(8.2%)N(7.5%)	63.49	-0.548	Nucleus
XP_020418064.1	PpLIC	1185	395	42.93	47.21	8.41	S(12.9%)GP(7.8%)Q(7.6%)	54.41	-0.692	Nucleus
XP_021813621.1	PaLIC	249	83	9.35	59.51	9.88	Q(15.7%)S( 14.5%)G(10.8%)	33.98	-1.016	Chloroplast. Golgi apparatus. Nucleus
VVA26147.1	PdLIC	1185	395	42.89	47.89	8.6	S(13.4%)P(7.8%)G(7.6%)	54.41	-0.684	Nucleus
PRQ35830.1	RcLIC	1161	387	42.04	64.93	8.13	S( 15.0%)NP(8.0%)G(6.7%)	55.22	-0.72	Nucleus
XP_008224558.1	PmLIC	1185	395	42.87	49.91	8.07	S( 13.9%)G(7.6%)NQP(7.3%)	57.11	-0.637	Nucleus
AT1G74500.1	AtILI1	282	93	10.58	81.61	9.17	SL(15.1%)R(14.0%)D(8.6%)	99.68	-0.68	Nucleus
LOC_Os04g54900.1	OsILI1	312	104	11.19	88.44	9.29	S(23.1%)L(12.5%)AR(10.6%)	88.27	-0.395	Nucleus
MD13G1074300	MdILI1-1	288	96	11.02	86.74	6.58	S(16.7%)RL(12.5%)D(8.3%)	87.4	-0.835	Nucleus
MD16G1075700	MdILI1-2	288	96	10.98	90.91	9.09	S(17.7%)RL(12.5%)D(8.3%)	87.4	-0.817	Nucleus
XP_004297318.1	FvILI1-1	294	98	11.19	92.62	9.03	S(18.4%)L(12.2%)R(11.2%)	87.55	-0.827	Nucleus
XP_004299384.1	FvILI1-2	276	92	10.43	83.61	9.17	SL(14.1%)R(13.0%)DT( 7.6%)	97.5	-0.633	Nucleus
Bras_G00092	RoILI1-1	291	97	10.97	70.21	9.03	S(15.5%)L(12.4%)RD(11.3%)	89.48	-0.741	Nucleus
Bras_G03217	RoILI1-2	276	92	10.39	91.23	9.17	S(16.3%)L( 14.1%)R(13.0%)	97.5	-0.604	Nucleus
KAB2633496.1	PcILI1-1	276	92	10.35	78.36	7.98	S(17.4%)L(13.0%)R(12.0%)	93.26	-0.671	Nucleus
KAB2624571.1	PcILI1-2	288	96	11	88.34	9.09	S(16.7%)RL(12.5%)NI(7.3%)	88.44	-0.822	Nucleus
XP_020417579.1	PpILI1-1	282	94	10.74	89.29	7.94	S( 18.1%)LR(12.8%)D(9.6%)	91.28	-0.721	Nucleus
XP_007210171.1	PpILI1-2	276	92	10.3	91.42	9.17	S(17.4%)LR(13.0%)AD(7.6%)	95.43	-0.6	Nucleus
XP_021820701.1	PaILI1	270	90	10.33	70.97	6.73	L(16.7%)S(14.4%)R(11.1%)	105.11	-0.579	Nucleus
VVA20138.1	PdILI1	273	91	10.36	80.6	7.93	S(15.4%)R(12.1%)L( 11.0%)	101.76	-0.57	Nucleus
PRQ53644.1	RcILI1-1	276	92	10.41	83.05	7.93	S(17.4%)R(12.0%)L(10.9%)	102.83	-0.482	Nucleus
PRQ40814.1	RcILI1-2	288	96	10.83	80.74	9.03	S(15.6%)L(12.5%)R(11.5%)	90.42	-0.739	Nucleus
PRQ16131.1	RcILI1-3	276	92	10.41	87.8	9.17	S(15.2%)L(14.1%)R( 13.0%)	97.5	-0.634	Nucleus
XP_008221650.1	PmILI1-1	282	94	10.71	87.08	7.93	S(18.1%)L(12.8%)R(11.7%)	91.28	-0.715	Nucleus
XP_008230751.1	PmILI1-2	273	91	10.36	80.6	7.93	S(15.4%)R(12.1%)L(11.0%)	101.76	-0.57	Nucleus
XP_008239815.1	PmILI1-3	276	92	10.27	92.34	9.17	S(17.4%)RL(13.0%)A(8.7%)	93.37	-0.626	Nucleus
AT4G08150.1	AtOSH1	1197	398	45.84	50.08	6.02	N(10.6%)S(10.1%)L(7.5%)	56.41	-1.113	Nucleus
LOC_Os03g51690.1	OsOSH1	1083	361	39.9	43.61	6.37	L(11.4%)A(10.5%)GS(7.8%)	79.56	-0.515	Nucleus
MD09G1112500	MdOSH1-1	1002	334	37.72	48.13	6.32	L(10.2%)S(9.9%)A(7.5%)	68.71	-0.61	Nucleus
MD17G1102600	MdOSH1-2	984	328	37.11	47.42	6.16	SL(10.4%)A(7.9%)N(5.8%)	71.46	-0.564	Nucleus
XP_011457674.1	FvOSH1	1158	386	43.75	52.31	6.07	S(9.3%)LA(8.0%)E(7.8%)	59.22	-0.944	Nucleus
Bras_G04434	RoOSH1	1170	390	44.24	54.68	5.83	S(8.7%)E(8.5%)L(7.9%)	59.62	-0.957	Nucleus
KAB2627728.1	PcOSH1-1	1167	389	44.37	54.07	5.92	L(9.5%)S(8.7%)EG(8.0%)	60.95	-1.035	Nucleus
KAB2619527.1	PcOSH1-2	1191	397	45.02	50.5	6.03	S(9.1%)LG(8.3%)E(8.1%)	59.24	-0.994	Nucleus
XP_007223047.1	PpOSH1	1167	389	44.39	49.76	6.13	E( 8.7%)S( 8.5%)L(8.2%)	59.23	-1.034	Nucleus
XP_021821782.1	PaOSH1-1	1065	355	40.57	50.53	6.2	S( 8.7%)E(8.5%)N(8.2%)	57.75	-1.099	Nucleus
XP_021831431.1	PaOSH1-2	987	329	36.81	43.39	6.89	S(10%)L(9.1%)A(7.3%)	62.04	-0.604	Nucleus
VVA11861.1	PdOSH1	1164	388	44.26	50.09	6.13	E(8.8%)S(8.5%)L( 8.2%)	59.64	-1.022	Nucleus
PRQ27903.1	RcOSH1	1182	394	44.81	51.19	6.09	SE(8.4%)A(8.1%)L(7.6%)	59.77	-0.969	Nucleus
XP_008220425.1	PmOSH1-1	1158	386	44.01	49.83	6.13	SE(8.5%)L(8.0%)G(7.5%)	60.7	-1.011	Nucleus
XP_008230002.1	PmOSH1-2	987	329	36.9	44.09	6.53	S(9.7%)L(9.4%)A(7.6%)	63.53	-0.63	Nucleus
AT3G11580.1	AtRAVL1	804	267	30.22	47.34	6.78	S(9.7%)V(8.6%)G(7.1%)	67.49	-0.636	Nucleus
LOC_Os02g45850.1	OsRAVL1	1200	400	42.83	67.37	6.77	S(12.5%)P(11.2%)A(11.0%)	59.12	-0.541	Nucleus
AT4G01500.1	AtRAV6	1002	333	38.51	57.71	7.83	S(11.1%)R(7.8%)P(7.2%)	53.51	-0.823	Nucleus
LOC_Os03g02900.1	OsRAV6	1236	412	43.95	62.25	7.33	A(12.1%)S(11.7%)G(10.2%)	63.62	-0.524	Nucleus
MD01G1091800	MdRAVL1-1/MdRAV6-1	1272	424	48.57	55.41	6.46	S(12.0%)P(9.0%)L(8.0%)	57.9	-0.974	Nucleus
MD07G1162400	MdRAVL1-2/MdRAV6-2	1320	440	50.3	52.46	7.28	S(13.2%)H(8.4%)P(8.0%)	52.52	-0.998	Nucleus
XP_004303521.2	FvRAVL1-1_FvRAV6-1	1080	360	40.08	60.37	6.23	S(11.7%)G(10.8%)Q(8.1%)	46.08	-0.993	Nucleus
XP_004306604.1	FvRAVL1-2_FvRAV6-2	1131	377	43.78	64.59	6.71	S(12.2%)P(8.0%)L(7.7%)	57.9	-1.007	Nucleus
Bras_G17377	RoRAVL1-1_RoRAV6-1	1035	345	38.34	64.53	6.17	S(12.8%)G(9.6%)Q(8.1%)	47.54	-0.959	Nucleus
Bras_G20423	RoRAVL1-2_RoRAV6-2	1137	379	44.16	63.67	7.93	S(11.3%)H(8.7%)L(8.2%)	58.36	-1.066	Nucleus
KAB2597934.1	PcRAVL1-1_PcRAV6-1	1299	433	50.47	53.9	6.78	S(9.7%)L(8.8%)Q(8.5%)	68.38	-0.861	Nucleus
KAB2633024.1	PcRAVL1-2_PcRAV6-2	1386	462	51.86	56.69	7.93	S( 12.1%)P( 8.4%)L(7.1%)	59.07	-0.783	Nucleus
KAB2595912.1	PcRAVL1-3_PcRAV6-3	1329	443	50.68	56.76	6.98	S(13.5%)H(8.6%)P(7.7%)	55.46	-0.978	Nucleus
KAB2608983.1	PcRAVL1-4_PcRAV6-4	1425	475	52.51	60.31	7.02	S(13.7%)G(8.8%)P(7.4%)	58.72	-0.736	Nucleus
XP_020412476.1	PpRAVL1-1_PpRAV6-1	1296	432	49.53	48.56	6.75	S(10.2%)P(8.6%)H(8.3%)	55.07	-1.02	Nucleus
XP_020420552.1	PpRAVL1-2_PpRAV6-2	1242	414	46.91	61.07	7.23	S(12.1%)Q(8.5%)L(8.0%)	59.57	-0.898	Nucleus
XP_021816640.1	PaRAVL1-1_PaRAV6-1	1239	413	46.28	58.33	6.83	S(13.3%)P(7.5%)GL(7.3%)	54.09	-0.866	Nucleus
XP_021822598.1	PaRAVL1-2_PaRAV6-2	1893	631	71.98	46.09	7	S(8.6%)L(8.2%)P(7.8%)	71.98	-0.481	Nucleus
VVA11861.1	PdRAVL1-1_PdRAV6-1	1296	432	49.4	49.67	6.84	S(10.0%)P(8.6%)H(8.3%)	55.97	-0.992	Nucleus
VVA19232.1	PdRAVL1-2_PdRAV6-2	1467	489	54.89	59.72	6.79	S(12.7%)Q(8.0%)L(7.6%)	57.03	-0.881	Nucleus
VVA15447.1	PdRAVL1-3_PdRAV6-3	1113	371	41.56	64.37	6.22	S(13.5%)P(8.1%)G(7.3%)	46.33	-1.002	Nucleus
PRQ16769.1	RcRAVL1-1_RcRAV6-1	1338	446	48.91	53.42	7.16	S(12.1%)G(10.1%)P(7.2%)	59.42	-0.679	Nucleus
PRQ58625.1	RcRAVL1-2_RcRAV6-2	1119	373	43.49	62.19	6.98	S(11.5%)L(8.6%)P(8.0%)	59.03	-1.025	Nucleus
XP_008239252.1	PmRAVL1-1_PmRAV6-1	1452	484	54.16	59.04	6.69	S(13.2%)L(7.4%)G(7.0%)	57.64	-0.849	Nucleus
XP_008244188.1	PmRAVL1-2_PmRAV6-2	1302	434	49.64	49.1	6.94	S(9.7%)P(9.0%)H(8.1%)	55.02	-1.003	Nucleus
AT2G41710.1	AtSMOS1	1272	423	46.47	52.2	8.29	S(11.6%)L(8.7%)A(8.5%)	63.76	-0.717	Cytoplasm
LOC_Os05g32270.1	OsSMOS1	1275	425	46.72	49.39	8.92	A(10.8%)S(8.7%)G(8.0%)	62.09	-0.603	Cytoplasm
MD12G1075200	MdSMOS1-1	1272	424	46.8	52.65	8.42	S(12.3%)G(9.0%)E(8.3%)	61.27	-0.748	Cytoplasm
MD12G1079800	MdSMOS1-2	1233	411	45.98	47.55	8.42	G(10.0%)S(9.5%)E(7.3%)	57.01	-0.696	Cytoplasm
MD14G1076000	MdSMOS1-3	1263	421	46.6	56.39	8.77	S(11.4%)G(9.0%)E(8.1%)	63.99	-0.685	Cytoplasm
XP_004304343.1	FvSMOS1	1266	422	46.76	50.02	7.58	S(10.0%)G(9.7%)AK(7.8%)	57.44	-0.821	Cytoplasm
Bras_G22445	RoSMOS1	1230	410	45.36	52.09	8.75	S(10.7%)A(9.8%)G(8.8%)	57.27	-0.819	Cytoplasm
KAB2627246.1	PcSMOS1-1	1263	421	46.47	54.74	8.77	S(12.1%)G(9.0%)E(7.6%)	63.54	-0.702	Cytoplasm
KAB2631280.1	PcSMOS1-2	1665	555	61.81	52.16	6.7	S(12.1%)L(10.1%)G(7.7%)	72.11	-0.527	Cytoplasm
XP_020424947.1	PpSMOS1	1275	425	47.2	48.61	9	S(11.1%)AG(8.2%)L(7.8%)	62.31	-0.749	Cytoplasm
XP_021810080.1	PaSMOS1-1	1449	483	52.78	46.1	9.01	S(14.7%)T(9.3%)A(7.9%)	51.8	-0.714	Cytoplasm. Nucleus
XP_021830981.1	PaSMOS1-2	555	185	20.82	51.07	8.77	AS(8.6%)G(8.1%)T(7.0%)	56	-0.503	Nucleus
VVA30349.1	PdSMOS1	1275	425	47.24	48.61	9	S( 11.3%)G(8.2%)AEL(7.8%)	62.52	-0.749	Cytoplasm
PRQ44750.1	RcSMOS1	1275	425	46.9	51.31	8.59	S(10.6%)A(10.1%)G(8.5%)	58.92	-0.78	Cytoplasm
XP_008245673.1	PmSMOS1	1290	430	47.79	48.36	8.91	S(10.9%)G(8.4%)A(8.1%)	62.49	-0.734	Cytoplasm
AT5G17800.1	AtCSA	972	323	36.89	43.31	9.39	S(9.9%)R(9.0%)N(8.0%)	57.4	-0.98	Nucleus
LOC_Os01g16810.1	OsCSA	1014	338	35.72	63.46	7.26	A(18.9%)P(8.9%)G(8.6%)	53.17	-0.48	Nucleus
MD12G1012700	MdCSA	1203	401	43.616	58.4	8.25	S(12.2%)G(9.0%)P(8.2%)	60.07	-0.652	Nucleus
XP_004301570.2	FvCSA	1026	342	37.97	56.13	8.32	S(14.3%)N(8.2%)L(7.3%)	61.05	-0.818	Nucleus
Bras_G00054	RoCSA1	1242	414	45.86	61.2	6.9	S(16.2%)A(8.0%)G(7.5%)	54.06	-0.754	Nucleus
Bras_G26782	RoCSA2	1137	379	42.28	46.94	7.33	S(10.0%)AG(6.9%)T( 6.6%)	56.94	-0.835	Nucleus
KAB2631653.1	PcCSA	1203	401	43.59	60.69	8.26	S(12.7%)G(9.0%)P(8.0%)	59.83	-0.658	Nucleus
XP_007226530.2	PpCSA	1434	478	52.9	58.54	6.23	S(14.4%)G(8.2%)N( 7.5%)	53.05	-0.754	Nucleus
XP_021802995.1	PaCSA1	777	259	29.99	70.66	7.74	R( 8.9%)E(7.7%)N(7.3%)	62.93	-0.866	Nucleus
XP_021810256.1	PaCSA2	1248	416	45.7	44.1	8.23	S(12.3%)G(10.1%)L(7.7%)	55.36	-0.775	Nucleus
VVA20505.1	PdCSA1	1392	464	51.43	61.73	6.14	S(14.4%)G(8.0%)E( 7.1%)	52.76	-0.759	Nucleus
VVA35113.1	PdCSA2	1236	412	45.3	45.24	8.85	S(11.7%)G( 9.7%)L(7.8%)	58.25	-0.768	Nucleus
PRQ40762.1	RcCSA	1215	405	44.9	61.44	6.5	S(15.3%)N(8.6%)A(8.1%)	49.48	-0.798	Nucleus
XP_008240578.1	PmCSA	1248	416	45.66	45.97	7.77	S( 11.1%)G(9.9%)L(7.7%)	58.87	-0.704	Nucleus
AT3G11540.1	AtSPY	2745	914	101.43	37.75	5.98	L(10.1%)A(9.4%)V(6.9%)	84.44	-0.214	Nucleus
LOC_Os08g44510.1	OsSPY	2784	928	102.64	37.97	5.55	A(10.5%)L(10.2%)V(7.2%)	88.55	-0.193	Nucleus
MD12G1030800	MdSPY1	2748	916	101.43	38.18	5.5	L(9.7%)A(9.3%)G(6.8%)	86.07	-0.194	Nucleus
MD14G1031300	MdSPY2	2751	917	101.48	38.34	5.58	A(9.7%)L(9.3%)G(6.9%)	83.65	-0.213	Nucleus
XP_011467265.1	FvSPY	2739	913	101.52	40.63	5.65	L(9.4%)A(9.3%)S(6.8%)	85.08	-0.203	Nucleus
Bras_G16956	RoSPY	2730	910	101.182	40.38	5.5	L( 10.7%)A( 9.1%)S(6.6%)	88.79	-0.164	Nucleus
KAB2631766.1	PcSPY1	2589	863	95.62	39.58	5.36	L(9.6%)A(8.7%)V(7.0%)	86.25	-0.176	Nucleus
KAB2607853.1	PcSPY2	2772	924	102.08	38.2	5.63	L(9.8%)A( 9.6%)G(7.0%)	85.13	-0.162	Nucleus
XP_020423223.1	PpSPY	2751	917	101.75	39.79	5.67	A(9.3%)G(6.7%)S(5.9%)	87.36	-0.203	Nucleus
XP_021819533.1	PaSPY	2727	909	100.93	40.61	5.67	L(9.9%)A(9.2%)G(6.6%)	86.84	-0.21	Nucleus
VVA13034.1	PdSPY1	2934	978	110.04	40.81	6.36	A(11.1%)L(10.6%)N(6.2%)	88.19	-0.21	Nucleus
VVA15457.1	PdSPY2	2751	917	101.72	39.85	5.67	L(9.9%)A(9.3%)G(6.7%)	86.94	-0.208	Nucleus
PRQ41628.1	RcSPY1	2919	973	109.68	40.24	6.22	A(10.8%)L(10.6%)N( 6.4%)	86.42	-0.213	Nucleus
PRQ44034.1	RcSPY2	2748	916	101.64	40.83	5.64	L(9.7%)A(9.4%)S(6.8%)	85.56	-0.206	Nucleus
XP_016652121.1	PmSPY1	2751	917	101.86	40.46	5.64	L(9.9%)A(9.2%)G(6.5%)	87.36	-0.207	Nucleus
XP_008243505.1	PmSPY2	2751	917	101.86	40.46	5.64	L(9.9%)A(9.2%)G(6.5%)	87.36	-0.207	Nucleus
AT3G02885.1	AtGSR1	294	97	10.85	38.56	9.68	C(13.4%)K(12.4%)L(10.3%)	58.35	-0.192	Golgi apparatus.
LOC_Os06g15620.1	OsGSR1	330	110	11.31	55.61	9.28	G(17.3%)C(10.9%)LK(9.1%)	61.27	-0.053	Cell wall. Golgi apparatus
MD15G1073900	MdGSR1	264	88	9.71	41.2	8.42	C(14.8%)K(11.4%)S(10.2%)	52.05	-0.108	Cell wall. Golgi apparatus
XP_011462662.1	FvGSR1-1	327	109	11.8	48.91	7.43	A(12.8%)C(11.0%)PS(7.3%)	57.52	-0.009	Golgi apparatus
XP_004299361.1	FvGSR1-2	300	100	11.02	46.65	9.12	C(13.0%)L(11.0%)K(9.0%)	60.6	-0.108	Golgi apparatus
XP_004304306.1	FvGSR1-3	324	108	11.93	38.3	9.33	C(11.1%)K(10.2%)G(9.3%)	51.48	-0.247	Golgi apparatus
Bras_G04123	RoGSR1-1	351	117	12.8	52.84	9	C(10.3%)PS(9.4%)L(7.7%)	54.19	-0.334	Cell wall. Golgi apparatus. Nucleus
Bras_G05510	RoGSR1-2	303	101	11.46	42	8.78	C(13.9%)L(10.9%)K(9.9%)	69.5	-0.017	Nucleus
Bras_G18896	RoGSR1-3	390	130	14.7	45.45	8.97	C(10.8%)K(8.5%)V(7.7%)	64.46	-0.445	Nucleus
KAB2615310.1	PcGSR1-1	321	107	11.73	42.17	9.2	C(12.1%)K(9.3%)AQG(8.4%)	55.7	-0.137	Golgi apparatus
KAB2633522.1	PcGSR1-2	324	108	11.85	51.16	9.27	C(11.1%)GK(9.3%)A(8.3%)	48.89	-0.218	Golgi apparatus
KAB2609370.1	PcGSR1-3	324	108	11.87	46.75	9.27	C(11.1%)GK(9.3%)A(8.3%)	45.28	-0.235	Golgi apparatus
XP_007216796.2	PpGSR1	348	116	12.89	45.06	8.95	C(11.2%)P(9.5%)T(7.8%)	55.52	-0.315	Nucleus
XP_021812050.1	PaGSR1	282	94	10.56	43.35	9.09	C(12.8%)L( 11.7%)P(9.6%)	65.32	-0.17	Golgi apparatus
VVA29828.1	PdGSR1	282	94	10.6	43.35	9.09	C(12.8%)L(10.6%)P(9.6%)	61.17	-0.181	Golgi apparatus
PRQ49681.1	RcGSR1	351	117	12.76	51.9	9.1	CP(10.3%)S(8.5%)LK(7.7%)	55.9	-0.396	Cell wall. Nucleus
XP_008229202.1	PmGSR1-1	282	94	10.6	43.35	9.09	C(12.8%)L(10.6%)P(9.6%)	61.17	-0.181	Golgi apparatus
XP_008240742.1	PmGSR1-2	348	116	12.87	40.8	9.11	C(10.3%)P( 9.5%)T(8.6%)	55.52	-0.342	Nucleus

## Sheet: Table S5
Table S5 Ka, Ks, and Ka/Ks ratio among corresponding orthologous BR downstream genes in each rosaceae specie.
Gene1	Gene2	Ka	Ks	Ka/Ks	Selection pressure
MdBZR1	MdBZR4	0.0108281	0.206939	0.052325	Purify selection
MdBZR1	MdBZR5	0.144843	1.3817	0.10483	Purify selection
MdBZR3	MdBZR6	0.0556755	0.207508	0.268305	Purify selection
MdBZR3	MdBZR7	0.244874	2.53741	0.0965056	Purify selection
MdBZR3	MdBZR8	0.350538	2.95358	0.118682	Purify selection
MdBZR4	MdBZR5	0.14386	1.3796	0.104277	Purify selection
MdBZR7	MdBZR8	0.124047	0.136891	0.906173	Purify selection
MdBZR2	MdBZR5	0.040593	0.18482	0.219636	Purify selection
MdRAVL1-1_MdRAV6-1	MdRAVL1-2_MdRAV6-2	0.0701023	0.281636	0.248911	Purify selection
MdOSH1-1	MdOSH1-2	0.0627614	0.228429	0.274753	Purify selection
MdSPY1	MdSPY2	0.0139528	0.138088	0.101042	Purify selection
MdSMOS1-1	MdSMOS1-2	0.0653291	0.143428	0.455484	Purify selection
MdSMOS1-1	MdSMOS1-3	0.0368963	0.197047	0.187246	Purify selection
MdSMOS1-2	MdSMOS1-3	0.0615249	0.142398	0.432063	Purify selection
MdILI1-1	MdILI1-2	0.0271216	0.066618	0.407121	Purify selection
FvGSR1-2	FvGSR1-3	0.161005	0.866496	0.185812	Purify selection
FvILI1-1	FvILI1-2	0.130879	3.26561	0.0400781	Purify selection
FvBZR1	FvBZR3	0.100697	0.965825	0.10426	Purify selection
PaBZR2	PaBZR3	0.135479	1.07341	0.126213	Purify selection
PaRAVL1-1_PaRAV6-1	PaRAVL1-2_PaRAV6-2	0.496585	2.50355	0.198352	Purify selection
PcBZR1	PcBZR5	0.0378984	0.155988	0.242956	Purify selection
PcBZR4	PcBZR5	0.154287	1.23873	0.124553	Purify selection
PcBZR6	PcBZR2	0.252472	1.78496	0.141445	Purify selection
PcBZR6	PcBZR3	0.293407	1.73034	0.169567	Purify selection
PcBZR2	PcBZR3	0.240562	1.45507	0.165327	Purify selection
PcSPY1	PcSPY2	0.0275899	0.122704	0.224849	Purify selection
PcRAVL1-2_PcRAV6-2	PcRAVL1-4_PcRAV6-4	0.0551022	0.181276	0.303968	Purify selection
PcRAVL1-1_PcRAV6-1	PcRAVL1-2_PcRAV6-2	0.488484	NaN	NaN	Purify selection
PcRAVL1-1_PcRAV6-1	PcRAVL1-4_PcRAV6-4	0.530955	4.59163	0.115635	Purify selection
PcRAVL1-1_PcRAV6-1	PcRAVL1-3_PcRAV6-3	0.147574	0.449741	0.328132	Purify selection
PcOSH1-1	PcOSH1-2	0.0546889	0.212631	0.257201	Purify selection
PcILI1-1	PcILI1-2	0.122677	NaN	NaN	Purify selection
PmBZR1	PmBZR4	0.243968	1.10316	0.221154	Purify selection
PmILI1-1	PmILI1-2	0.147459	1.48886	0.0990412	Purify selection
PmILI1-2	PmILI1-3	0.139939	NaN	NaN	Purify selection
PmILI1-3	PmILI1-1	0.104539	2.15993	0.0483995	Purify selection
PmSPY1	PmSPY2	0.474866	1.86696	0.254353	Purify selection
PpBZR1	PpBZR4	0.243237	1.13151	0.214967	Purify selection
PpRAVL1-1_PpRAV6-1	PpRAVL1-2_PpRAV6-2	0.401776	4.2624	0.0942606	Purify selection
PpILI1-1	PpILI1-2	0.789511	4.78451	0.165014	Purify selection
RcILI1-1	RcILI1-3	0.14081	4.15398	0.0338975	Purify selection
RcILI1-2	RcILI1-3	0.0796299	4.47268	0.0178036	Purify selection
RcBZR1	RcBZR4	0.274656	1.88474	0.145726	Purify selection
RcRAVL1-1_RcRAV6-1	RcRAVL1-2_RcRAV6-2	0.408226	2.45289	0.166427	Purify selection
RoBZR1	RoBZR2	0.856862	4.57773	0.187181	Purify selection
RoILI1-1	RoILI1-2	0.489528	4.98307	0.0982383	Purify selection

## Sheet: Table S6
Table S6 Ka, Ks, and Ka/Ks ratio among corresponding orthologous BR downstream genes between Oryza sativa and each rosaceae species.
Gene1	Gene2	Ka	Ks	Ka/Ks	Selection pressure
OsBZR1	MdBZR6	0.314362	1.49475	0.21031	Purify selection
OsBZR2	MdBZR2	0.241297	1.76028	0.137079	Purify selection
OsBZR2	MdBZR4	0.268288	1.55505	0.172527	Purify selection
OsBZR2	FvBZR2	0.244824	1.69543	0.144402	Purify selection
OsBZR2	RoBZR3	0.273523	1.63562	0.167229	Purify selection
OsBZR2	PpBZR3	0.235717	1.7998	0.130968	Purify selection
OsBZR2	PaBZR2	0.255655	1.50585	0.169774	Purify selection
OsGSR1	FvGSR1-1	0.33248	1.57859	0.210619	Purify selection
OsOSH1	RoOSH1	0.362661	NaN	NaN	Purify selection
OsOSH1	PcOSH1-1	0.377444	NaN	NaN	Purify selection
OsOSH1	PpOSH1	0.318979	NaN	NaN	Purify selection
OsOSH1	RcOSH1	0.320679	NaN	NaN	Purify selection
OsOSH1	PmOSH1-1	0.317989	NaN	NaN	Purify selection

## Sheet: Table S7
Table S7 Secondary structures analysis of BR downstream proteins
	α helix		Extended strand		Random coil		β turn
Gene Name	Amino acid length	Proportion (%)	Amino acid length	Proportion (%)	Amino acid length	Proportion (%)	Amino acid length	Proportion (%)
AtBZR1	68	0.2024	32	0.0952	219	0.6518	17	0.0506
AtBZR2	81	0.2418	27	0.0806	212	0.6328	15	0.0448
OsBZR1	47	0.1577	27	0.0906	204	0.6846	20	0.0671
OsBZR2	54	0.1479	37	0.1014	257	0.7041	17	0.0466
MdBZR1	57	0.1722	28	0.0846	231	0.6979	15	0.0453
MdBZR2	57	0.1759	31	0.0957	219	0.6759	17	0.0525
MdBZR3	54	0.1831	29	0.0983	200	0.678	12	0.0407
MdBZR4	61	0.1843	28	0.0846	230	0.6949	12	0.0363
MdBZR5	55	0.1698	29	0.0895	220	0.679	20	0.0617
MdBZR6	55	0.1864	28	0.0949	198	0.6712	14	0.0475
MdBZR7	55	0.1746	25	0.0794	222	0.7048	13	0.0413
MdBZR8	63	0.2763	17	0.0746	138	0.6053	10	0.0439
FvBZR1	75	0.1933	46	0.1186	247	0.6366	20	0.0515
FvBZR2	65	0.1816	42	0.1173	232	0.648	19	0.0531
FvBZR3	44	0.1366	28	0.087	237	0.736	13	0.0404
FvBZR4	63	0.1915	31	0.0942	219	0.6657	16	0.0486
RoBZR1	43	0.1331	38	0.1176	226	0.6997	16	0.0495
RoBZR2	57	0.181	24	0.0762	221	0.7016	13	0.0413
RoBZR3	65	0.1976	33	0.1003	216	0.6565	15	0.0456
RoBZR4	76	0.2111	39	0.1083	233	0.6472	12	0.0333
PcBZR1	49	0.1512	23	0.071	239	0.7377	13	0.0401
PcBZR2	52	0.1763	29	0.0983	201	0.6814	13	0.0441
PcBZR3	834	0.3452	400	0.1656	984	0.4073	198	0.082
PcBZR4	54	0.1631	30	0.0906	234	0.7069	13	0.0393
PcBZR5	60	0.1852	24	0.0741	227	0.7006	13	0.0401
PcBZR6	43	0.1361	30	0.0949	227	0.7184	16	0.0506
PpBZR1	63	0.2143	22	0.0748	197	0.6701	12	0.0408
PpBZR2	46	0.1424	34	0.1053	225	0.6966	18	0.0557
PpBZR3	57	0.1759	22	0.0679	231	0.713	14	0.0432
PpBZR4	48	0.1514	24	0.0757	228	0.7192	17	0.0536
PaBZR1	21	0.118	29	0.1629	116	0.6517	12	0.0674
PaBZR2	46	0.1424	34	0.1053	225	0.6966	18	0.0557
PaBZR3	44	0.1275	40	0.1159	246	0.713	15	0.0435
PdBZR1	63	0.2143	19	0.0646	195	0.6633	17	0.0578
PdBZR2	58	0.1796	28	0.0867	221	0.6842	16	0.0495
PdBZR3	58	0.1758	36	0.1091	219	0.6636	17	0.0515
PdBZR4	43	0.1352	28	0.0881	231	0.7264	16	0.0503
RcBZR1	23	0.0983	20	0.0855	184	0.7863	7	0.0299
RcBZR2	28	0.1138	27	0.1098	185	0.752	6	0.0244
RcBZR3	58	0.1785	35	0.1077	217	0.6677	15	0.0462
RcBZR4	81	0.2263	53	0.148	202	0.5642	22	0.0615
PmBZR1	60	0.2041	24	0.0816	196	0.6667	14	0.0476
PmBZR2	46	0.1424	34	0.1053	225	0.6966	18	0.0557
PmBZR3	49	0.1512	23	0.071	12	0.037	240	0.7407
PmBZR4	63	0.1987	28	0.0883	214	0.6751	12	0.0379
OsDLT	257	0.4165	61	0.0989	274	0.4441	25	0.0405
AtDLT	246	0.3886	56	0.0885	308	0.4866	23	0.0363
MdDLT	240	0.3509	63	0.0921	358	0.5234	23	0.0336
FvDLT	244	0.3731	66	0.1009	316	0.4832	28	0.0428
RoDLT	238	0.3601	67	0.1014	331	0.5008	25	0.0378
PcDLT	242	0.3569	67	0.0988	348	0.5133	21	0.031
PpDLT	251	0.3601	66	0.0947	352	0.505	28	0.0402
PaDLT	247	0.3544	60	0.0861	364	0.5222	26	0.0373
PdDLT	252	0.3615	71	0.1019	347	0.4978	27	0.0387
RcDLT	253	0.3833	62	0.0939	24	0.0364	321	0.4864
PmDLT	247	0.3544	70	0.1004	353	0.5065	27	0.0387
OsLIC	62	0.159	25	0.0641	293	0.7513	10	0.0256
AtLIC	56	0.1287	31	0.0713	338	0.777	10	0.023
MdLIC	66	0.1692	23	0.059	289	0.741	12	0.0308
FvLIC	63	0.1667	27	0.0714	278	0.7354	10	0.0265
RoLIC	51	0.1253	40	0.0983	303	0.7445	13	0.0319
PcLIC	71	0.1711	34	0.0819	297	0.7157	13	0.0313
PpLIC	60	0.1519	23	0.0582	303	0.7671	9	0.0228
PaLIC	6	0.0723	12	0.1446	61	0.7349	4	0.0482
PdLIC	55	0.1392	27	0.0684	304	0.7696	9	0.0228
RcLIC	59	0.1525	27	0.0698	291	0.7519	10	0.0258
PmLIC	57	0.1443	29	0.0734	296	0.7494	13	0.0329
OsILI1	58	0.5577	1	0.0096	45	0.4327	0	0
AtILI1	61	0.6559	0	0	32	0.3441	0	0
MdILI1-1	57	0.5938	1	0.0104	38	0.3958	0	0
MdILI1-2	59	0.6146	1	0.0104	36	0.375	0	0
FvILI1-1	59	0.602	0	0	39	0.398	0	0
FvILI1-2	59	0.6413	1	0.0109	30	0.3261	2	0.0217
RoILI1-1	61	0.6289	1	0.0103	35	0.3608	0	0
RoILI1-2	62	0.6739	1	0.0109	27	0.2935	2	0.0217
PcILI1-1	62	0.6739	3	0.0326	25	0.2717	2	0.0217
PcILI1-2	56	0.5833	1	0.0104	39	0.4062	0	0
PpILI1-1	59	0.6277	1	0.0106	34	0.3617	0	0
PpILI1-2	63	0.6848	1	0.0109	26	0.2826	2	0.0217
PaILI1	70	0.7778	0	0	18	0.2	2	0.0222
PdILI1	57	0.6264	1	0.011	33	0.3626	0	0
RcILI1-1	64	0.6957	0	0	28	0.3043	0	0
RcILI1-2	57	0.5938	1	0.0104	38	0.3958	0	0
RcILI1-3	61	0.663	1	0.0109	28	0.3043	2	0.0217
PmILI1-1	57	0.6064	1	0.0106	36	0.383	0	0
PmILI1-2	57	0.6264	1	0.011	33	0.3626	0	0
PmILI1-3	60	0.6522	1	0.0109	30	0.3261	1	0.0109
OsOSH1	188	0.5208	19	0.0526	133	0.3684	21	0.0582
AtOSH1	157	0.3945	27	0.0678	202	0.5075	12	0.0302
MdOSH1-1	143	0.4281	14	0.0419	161	0.482	16	0.0479
MdOSH1-2	155	0.4726	19	0.0579	140	0.4268	14	0.0427
FvOSH1	156	0.4041	29	0.0751	184	0.4767	17	0.044
RoOSH1	147	0.3769	26	0.0667	200	0.5128	17	0.0436
PcOSH1-1	137	0.3522	34	0.0874	198	0.509	20	0.0514
PcOSH1-2	158	0.398	31	0.0781	184	0.4635	24	0.0605
PpOSH1	151	0.3882	29	0.0746	190	0.4884	19	0.0488
PaOSH1-1	129	0.3634	27	0.0761	182	0.5127	17	0.0479
PaOSH1-2	147	0.4468	16	0.0486	152	0.462	14	0.0426
PdOSH1	135	0.3479	31	0.0799	205	0.5284	17	0.0438
RcOSH1	151	0.3832	30	0.0761	197	0.5	16	0.0406
PmOSH1-1	146	0.3782	28	0.0725	200	0.5181	12	0.0311
PmOSH1-2	176	0.535	14	0.0426	126	0.383	13	0.0395
OsRAVL1	79	0.1975	62	0.155	243	0.6075	16	0.04
AtRAVL1	29	0.1086	57	0.2135	165	0.618	16	0.0599
OsRAV6	64	0.1553	71	0.1723	257	0.6238	20	0.0485
AtRAV6	34	0.1021	67	0.2012	214	0.6426	18	0.0541
MdRAVL1-1/MdRAV6-1	61	0.1439	95	0.2241	240	0.566	28	0.066
MdRAVL1-2/MdRAV6-2	64	0.1455	96	0.2182	257	0.5841	23	0.0523
FvRAVL1-1_FvRAV6-1	34	0.0944	71	0.1972	237	0.6583	18	0.05
FvRAVL1-2_FvRAV6-2	67	0.1777	76	0.2016	215	0.5703	19	0.0504
RoRAVL1-1_RoRAV6-1	34	0.0986	70	0.2029	223	0.6464	18	0.0522
RoRAVL1-2_RoRAV6-2	60	0.1583	79	0.2084	220	0.5805	20	0.0528
PcRAVL1-1_PcRAV6-1	79	0.1824	98	0.2263	219	0.5058	37	0.0855
PcRAVL1-2_PcRAV6-2	45	0.0974	89	0.1926	307	0.6645	21	0.0455
PcRAVL1-3_PcRAV6-3	61	0.1377	83	0.1874	277	0.6253	22	0.0497
PcRAVL1-4_PcRAV6-4	47	0.0989	99	0.2084	303	0.6379	26	0.0547
PpRAVL1-1_PpRAV6-1	69	0.1597	75	0.1736	256	0.5926	32	0.0741
PpRAVL1-2_PpRAV6-2	68	0.1643	86	0.2077	232	0.5604	28	0.0676
PaRAVL1-1_PaRAV6-1	53	0.1283	82	0.1985	252	0.6102	26	0.063
PaRAVL1-2_PaRAV6-2	139	0.2203	140	0.2219	294	0.4659	58	0.0919
PdRAVL1-1_PdRAV6-1	68	0.1574	86	0.1991	232	0.537	46	0.1065
PdRAVL1-2_PdRAV6-2	70	0.1431	101	0.2065	285	0.5828	33	0.0675
PdRAVL1-3_PdRAV6-3	30	0.0809	60	0.1617	264	0.7116	17	0.0458
RcRAVL1-1_RcRAV6-1	68	0.1823	77	0.2064	21	0.0563	207	0.555
RcRAVL1-2_RcRAV6-2	42	0.0942	84	0.1883	298	0.6682	22	0.0493
PmRAVL1-1_PmRAV6-1	65	0.1343	88	0.1818	304	0.6281	27	0.0558
PmRAVL1-2_PmRAV6-2	62	0.1429	87	0.2005	239	0.5507	46	0.106
OsSMOS1	139	0.3271	38	0.0894	234	0.5506	14	0.0329
AtSMOS1	137	0.3239	52	0.1229	221	0.5225	13	0.0307
MdSMOS1-1	139	0.3278	39	0.092	235	0.5542	11	0.0259
MdSMOS1-2	142	0.3455	41	0.0998	221	0.5377	7	0.017
MdSMOS1-3	136	0.323	40	0.095	236	0.5606	9	0.0214
FvSMOS1	142	0.3365	36	0.0853	235	0.5569	9	0.0213
RoSMOS1	148	0.361	22	0.0537	233	0.5683	7	0.0171
PcSMOS1-1	150	0.3563	36	0.0855	223	0.5297	12	0.0285
PcSMOS1-2	220	0.3964	60	0.1081	248	0.4468	27	0.0486
PpSMOS1	134	0.3153	34	0.08	244	0.5741	13	0.0306
PaSMOS1-1	69	0.1429	89	0.1843	302	0.6253	23	0.0476
PaSMOS1-2	63	0.3405	34	0.1838	72	0.3892	16	0.0865
PdSMOS1	133	0.3129	38	0.0894	239	0.5624	15	0.0353
RcSMOS1	140	0.3294	39	0.0918	234	0.5506	12	0.0282
PmSMOS1	152	0.3535	35	0.0814	236	0.5488	7	0.0163
OsCSA	115	0.3402	26	0.0769	165	0.4882	32	0.0947
AtCSA	91	0.2817	44	0.1362	165	0.5108	23	0.0712
MdCSA	75	0.187	54	0.1347	256	0.6384	16	0.0399
FvCSA	78	0.2281	35	0.1023	214	0.6257	15	0.0439
RoCSA1	93	0.2246	38	0.0918	268	0.6473	15	0.0362
RoCSA2	76	0.2005	50	0.1319	240	0.6332	13	0.0343
PcCSA	80	0.1995	58	0.1446	246	0.6135	17	0.0424
PpCSA	126	0.2636	53	0.1109	276	0.5774	23	0.0481
PaCSA1	97	0.3745	25	0.0965	119	0.4595	18	0.0695
PaCSA2	79	0.1899	60	0.1442	260	0.625	17	0.0409
PdCSA1	125	0.2694	42	0.0905	273	0.5884	24	0.0517
PdCSA2	87	0.2112	55	0.1335	248	0.6019	22	0.0534
RcCSA	100	0.2469	40	0.0988	248	0.6123	17	0.042
PmCSA	84	0.2019	57	0.137	247	0.5938	28	0.0673
OsSPY	530	0.5711	77	0.083	272	0.2931	49	0.0528
AtSPY	511	0.5591	73	0.0799	275	0.3009	55	0.0602
MdSPY1	524	0.5721	65	0.071	277	0.3024	50	0.0546
MdSPY2	519	0.566	73	0.0796	275	0.2999	50	0.0545
FvSPY	526	0.5761	74	0.0811	272	0.2979	41	0.0449
RoSPY	494	0.5429	86	0.0945	277	0.3044	53	0.0582
PcSPY1	481	0.5574	73	0.0846	265	0.3071	44	0.051
PcSPY2	514	0.5563	77	0.0833	281	0.3041	52	0.0563
PpSPY	496	0.5409	74	0.0807	296	0.3228	51	0.0556
PaSPY	520	0.5721	68	0.0748	277	0.3047	44	0.0484
PdSPY1	555	0.5675	87	0.089	285	0.2914	51	0.0521
PdSPY2	523	0.5703	81	0.0883	267	0.2912	46	0.0502
RcSPY1	570	0.5858	79	0.0812	271	0.2785	53	0.0545
RcSPY2	508	0.5546	65	0.071	289	0.3155	54	0.059
PmSPY1	511	0.5573	70	0.0763	283	0.3086	53	0.0578
PmSPY2	511	0.5573	70	0.0763	283	0.3086	53	0.0578
OsGSR1	19	0.1727	8	0.0727	75	0.6818	8	0.0727
AtGSR1	37	0.3814	8	0.0825	45	0.4639	7	0.0722
MdGSR1	27	0.3068	6	0.0682	55	0.625	0	0
FvGSR1-1	25	0.2294	9	0.0826	73	0.6697	2	0.0183
FvGSR1-2	31	0.31	9	0.09	56	0.56	4	0.04
FvGSR1-3	34	0.3148	5	0.0463	64	0.5926	5	0.0463
RoGSR1-1	19	0.1624	15	0.1282	81	0.6923	2	0.0171
RoGSR1-2	33	0.3267	12	0.1188	52	0.5149	4	0.0396
RoGSR1-3	45	0.3462	23	0.1769	56	0.4308	6	0.0462
PcGSR1-1	32	0.2991	5	0.0467	65	0.6075	5	0.0467
PcGSR1-2	35	0.3241	8	0.0741	57	0.5278	8	0.0741
PcGSR1-3	29	0.2685	9	0.0833	64	0.5926	6	0.0556
PpGSR1	7	0.0603	13	0.1121	92	0.7931	4	0.0345
PaGSR1	26	0.2766	5	0.0532	57	0.6064	6	0.0638
PdGSR1	29	0.3085	7	0.0745	53	0.5638	5	0.0532
RcGSR1	23	0.1966	9	0.0769	79	0.6752	6	0.0513
PmGSR1-1	29	0.3085	7	0.0745	53	0.5638	5	0.0532
PmGSR1-2	28	0.2414	8	0.069	73	0.6293	7	0.0603

## Sheet: Table S8
Table S8 GO and KEGG analysis of interactive proteins identified in Figure S9
GO Terms
GO-term	description	false discovery rate	symbol
GO:0009742	brassinosteroid mediated signaling pathway	2.47e-16
GO:0006355	regulation of transcription, DNA-templated	1.96e-15
GO:0009755	hormone-mediated signaling pathway	2.94e-12
GO:0048583	regulation of response to stimulus	2.34e-10
GO:0040008	regulation of growth	3.55e-09
GO:0032502	developmental process	0.0064
GO:0003677	DNA binding	8.62e-09
GO:0003700	DNA-binding transcription factor activity	1.14e-08
GO:0005634	nucleus	9.29e-13
KEGG Pathways
pathway	description	false discovery	symbol
osa04075	Plant hormone signal transduction	0.0019
